# Supplementary material for: Trends and determinants of early initiation of breastfeeding and exclusive breastfeeding in Ethiopia from 2000 to 2016
Source: PubMed Central journal article supplement (PMC6740001; doi:10.1186/s13006-019-0234-9), 2019-09-11
Supplement: 13006_2019_234_MOESM1_ESM.pdf [file 13006_2019_234_MOESM1_ESM.pdf]

## Additional file 1

Characteristics of the study participants in Ethiopia, 2000–2016

| Variables                      | 2000        | 2005        | 2011        | 2016        | 2000–2016    |
|--------------------------------|-------------|-------------|-------------|-------------|--------------|
|                                | (N=3680)    | (N= 3528)   | (N= 4037)   | (N= 3861)   | (N=15,106)   |
|                                | n (%)       | n (%)       | n (%)       | n (%)       | n (%)        |
| <b>Socioeconomic factors</b>   |             |             |             |             |              |
| Maternal education             |             |             |             |             |              |
| No schooling                   | 3434 (81.1) | 3120 (77.9) | 2802 (66.8) | 2460 (60.3) | 11846 (71.5) |
| Primary school                 | 582 (13.7)  | 705 (17.6)  | 1204 (28.7) | 1262 (30.9) | 3753 (22.7)  |
| Secondary and higher           | 220 (5.2)   | 183 (4.5)   | 191 (4.5)   | 360 (8.8)   | 954 (5.8)    |
| Maternal employment            |             |             |             |             |              |
| No employment                  | 1640 (38.7) | 2915 (72.8) | 2096 (50.4) | 2416 (59.2) | 9066 (55.0)  |
| Formal employment              | 373 (8.8)   | 284 (7.1)   | 686 (16.5)  | 508 (12.4)  | 1851 (11.2)  |
| Informal employment            | 2222 (52.5) | 804 (20.1)  | 1379 (33.1) | 1160 (28.4) | 5565 (33.8)  |
| Partner education              |             |             |             |             |              |
| No schooling                   | 2599 (62.2) | 2230 (56.2) | 1989 (48.1) | 1744 (45.2) | 8562 (53.1)  |
| Primary school                 | 1098 (26.3) | 1289 (32.5) | 1765 (42.7) | 1548 (40.1) | 5700 (35.3)  |
| Secondary and higher           | 480 (11.5)  | 449 (11.3)  | 380 (9.2)   | 569 (14.7)  | 1878 (11.6)  |
| Household wealth status        |             |             |             |             |              |
| Poor                           | 1295 (30.6) | 1711 (42.7) | 1913 (45.6) | 1846 (45.2) | 6765 (40.9)  |
| middle                         | 1197 (28.3) | 879 (21.9)  | 878 (20.9)  | 859 (21.0)  | 3812 (12.1)  |
| Rich                           | 1743 (41.2) | 1417 (35.4) | 1407 (33.5) | 1378 (33.8) | 5946 (36.0)  |
| <b>Demographic factors</b>     |             |             |             |             |              |
| Maternal age                   |             |             |             |             |              |
| 15-24 years                    | 1408 (33.3) | 1267 (31.6) | 1285 (30.6) | 1207 (29.6) | 5167 (31.3)  |
| 25-34 years                    | 1936 (45.7) | 1900 (47.4) | 2077 (49.5) | 2067 (50.6) | 7980 (48.3)  |
| 35-49 years                    | 891 (21)    | 840 (21.0)  | 835 (1.9)   | 809 (19.8)  | 3375 (20.4)  |
| Child sex                      |             |             |             |             |              |
| Male                           | 2181 (51.5) | 2074 (51.8) | 2166 (51.6) | 1945 (47.6) | 8366 (50.6)  |
| Female                         | 2054 (48.5) | 1933 (48.2) | 2031 (48.4) | 2138 (52.4) | 8157 (49.4)  |
| Birth order                    |             |             |             |             |              |
| One                            | 721 (17.0)  | 696 (17.4)  | 736 (17.5)  | 845 (20.7)  | 2998 (18.1)  |
| 2-4                            | 1840 (43.4) | 1753 (43.7) | 1895 (45.2) | 1740 (42.6) | 7228 (43.8)  |
| 5+                             | 1675 (39.6) | 1558 (38.9) | 1566 (37.3) | 1498 (36.7) | 6297 (38.1)  |
| Family size                    |             |             |             |             |              |
| ≤ 3                            | 471 (11.1)  | 426 (10.6)  | 485 (11.6)  | 484 (11.8)  | 1866 (11.3)  |
| 4-5                            | 1445 (34.1) | 1321 (33.0) | 1447 (34.5) | 1411 (34.6) | 5624 (34.0)  |
| 6+                             | 2319 (54.8) | 2260 (56.4) | 2265 (54.9) | 2188 (53.6) | 9032 (54.7)  |
| Desire for pregnancy           |             |             |             |             |              |
| Desired the pregnancy          | 3456 (81.6) | 3293 (82.2) | 3755 (89.5) | 3740 (91.6) | 14243 (86.2) |
| Not desired the pregnancy      | 778 (18.4)  | 714 (17.8)  | 442 (10.5)  | 343 (8.4)   | 2277 (13.8)  |
| <b>Health service factors</b>  |             |             |             |             |              |
| Antenatal Visit                |             |             |             |             |              |
| None                           | 3122 (74.2) | 2845 (71.3) | 2369 (56.6) | 1412 (34.8) | 9748 (59.3)  |
| 1-3                            | 691 (16.4)  | 664 (16.6)  | 1085 (25.9) | 1288 (31.7) | 3727 (22.6)  |
| 4+                             | 396 (9.4)   | 479 (12)    | 735 (17.6)  | 1362 (33.5) | 2972 (18.1)  |
| Mode of delivery               |             |             |             |             |              |
| Vaginal birthing               | 4205 (99.5) | 3968 (99)   | 4115 (98.1) | 3978 (97.4) | 16266 (98.5) |
| Caesarean section              | 23 (0.5)    | 39 (1.0)    | 82 (1.9)    | 105 (2.6)   | 250 (1.5)    |
| Place of birth                 |             |             |             |             |              |
| Home                           | 4028 (95.1) | 3763 (93.9) | 3721 (88.7) | 2593 (63.5) | 14104 (85.4) |
| Health facility                | 208 (4.9)   | 242 (6.1)   | 476 (11.4)  | 1490 (36.5) | 2416 (14.6)  |
| Delivery assistance            |             |             |             |             |              |
| Health professional            | 3397 (24.1) | 432 (11.4)  | 491 (12.1)  | 1521 (43.9) | 2829 (18.5)  |
| Traditional birth attendant    | 3103 (22.0) | 522 (13.8)  | 253 (6.2)   | 1387 (40.0) | 3002 (19.6)  |
| Others untrained               | 7621 (54.0) | 2829 (74.8) | 3304 (81.6) | 560 (16.1)  | 9460 (61.9)  |
| Timing of postnatal checkup    |             |             |             |             |              |
| None                           | 4006 (94.6) | 3786 (94.5) | 4065 (96.9) | 3776 (92.3) | 15632 (94.6) |
| Within a week                  | 179 (4.2)   | 176 (4.4)   | 42 (1.0)    | 154 (3.8)   | 551 (3.3)    |
| After a week                   | 50 (1.2)    | 46 (1.1)    | 90 (2.1)    | 153 (3.7)   | 338 (2.10)   |
| <b>Community-level factors</b> |             |             |             |             |              |
| Place of residence             |             |             |             |             |              |

|                          |             |             |             |             |              |
|--------------------------|-------------|-------------|-------------|-------------|--------------|
| Urban                    | 405 (9.6)   | 296 (7.4)   | 558 (13.3)  | 492 (12.0)  | 1750 (10.6)  |
| Rural                    | 3831 (90.4) | 3711 (92.6) | 3639 (86.7) | 3591 (88.0) | 14773 (89.4) |
| Region of residence      |             |             |             |             |              |
| Large central regions    | 4011 (94.7) | 3690 (92.1) | 3865 (92.1) | 3691 (90.4) | 15257 (92.3) |
| Small peripheral regions | 135 (3.2)   | 237 (5.9)   | 218 (5.2)   | 262 (6.4)   | 853 (5.2)    |
| Metropolis               | 89 (2.1)    | 80 (2.0)    | 113 (2.7)   | 130 (3.2)   | 413 (2.5)    |

**n (%)**: weighted count and proportion for each study factors
